# Supplementary material for: Mechanisms in Growth-Promoting of Cucumber by the Endophytic Fungus Chaetomium globosum Strain ND35
Source: J Fungi (Basel). 2022 Feb 11;8(2):180. doi: 10.3390/jof8020180 (PMC8878499; doi:10.3390/jof8020180)
Supplement: Supplementary file 1 [file jof-08-00180-s001.zip › Supplementary S2.xls]

## Sheet: S1
Table S1 List of primers used in this study
Gene_ID	Forward primer	Reverse primer	Length	Description
Csa1G062960	TGCCCTGGAGTTGTCTCCT	GGCCAGGGTTCAGCACAG	313	peroxidase 42
Csa1G534750	GGAGGAGTTCTTCAACGGCA	CCTGCAGGGCCATAGTTGAA	330	endochitinase PR4-like
Csa2G070310	CGAAGCTGTTGCTTATGGAGC	CTTGCTCGCTCTCCTTCGTAT	249	heat shock 70 kDa protein
Csa2G355020	GGTTCAAAACCGCTCACGAC	GTAATCGACGGAAGCCACCA	126	F-box protein GID2-like
Csa2G356070	CACCGCTACAATGCTGCAC	CTACGTCCATCACGCCGTT	218	cyclin-D3-3-like
Csa2G406780	GATGTTTCCCCAATCCCCCA	GGAGAGAGTTTCCCATCGCC	143	calcium-binding protein CML38-like
Csa3G020080	GGTGAGTGTGGAGCAGAACA	GAGGGGCCAAACTACTCACT	225	small heat shock protein, chloroplastic-like isoform X2
Csa3G135120	TGCATTCATCTCCCCGCTTT	TGATTCGTATGTGCCCTCGG	160	ethylene-responsive transcription factor 1B
Csa3G183950	GACCTTCGCCTTTCAGGCT	GACCTTGCGATGGTTCCCA	285	heat shock protein 83
Csa3G638510	CTCCTGGTAAAACCGGCGA	TGTGAGTGCACTTCCTGGC	335	4-coumarate--CoA ligase-like 6
Csa3G716870	TGCCGATTGACGATACCTCT	AACCGGTAATGGCTGCTTGA	246	cinnamoyl-CoA reductase 2-like isoform X1
Csa3G730890	CGTGGCCGTCTACCATACTC	TGAGGGTTATCGAATCGCCG	120	abscisic acid receptor PYL4-like
Csa3G736970	CTGAAGCAACAGTCGCCCT	GGATCGATGGTGGGATCGAC	103	peroxidase 21-like
Csa3G822100	GTTATGGCTGCCGATTCCCA	TCGAAGCCAGTCATTCCAGG	281	two-component response regulator ARR9
Csa3G822220	GTCTCCCACCCGAGGTACT	TCGGCAGCAACCGAAAGAT	148	regulatory protein NPR5-like
Csa3G883020	TTTAGGGCATCCGGCGTTT	GGACTCTGTGGACGGTGTG	231	auxin-induced protein 6B
Csa4G036580	CAAAATCGGGAAGCAGCTCG	GGATCCAGCCAAGAGACCTT	138	transcription factor TGA1 isoform X1
Csa4G050120	TCGAAAGCAAGTCGAGCGT	TTCGGGTTCTCAAGTGCCG	144	WRKY transcription factor 22-like
Csa4G304760	GATCCCAGCCATTGAGGAAGG	TCTTCTAGTTGGCCGTTAAAACAAC	173	probable glutathione S-transferase
Csa5G374730	AGAGCTCTCGCCCGACTA	AGTACAGCCCTGCCCAAC	223	auxin transporter-like protein 3
Csa5G589940	GCCAACGCCTATCCGAGG	AATGCAAGCGCCGTTGTG	206	putative caffeoyl-CoA O-methyltransferase At1g67980
Csa6G056520	CTAGGGAACGGAAGCAGGC	CCGAATCACTCGTTGGGGT	176	G-box-binding factor 4
Csa6G139750	TCAAATTCGGCGAGGCTGT	ATTTCACCCAACGGACCCC	184	chlorophyll a-b binding protein of LHCII type 1-like
Csa6G147460	CGACGGCGGAGTTAAGGT	GCAGTGTGAGGCAACGTG	243	phenylalanine ammonia-lyase-like
Csa6G445750	TTCTGAGTCCGCTAGAGTCG	CCCGAATAGCCTTGAAGAAGAG	273	phenylalanine ammonia-lyase
Csa6G493310	TCCTCACCAGTTCTGGGACA	GTACTGGACGAGCCACCAAA	207	probable indole-3-acetic acid-amido synthetase GH3.1
Csa7G049140	AACTCGGCTAGAGGGTTCG	TCGCTGTCCTCGAGTCCTT	175	peroxidase P7-like
Csa7G378520	CTGTCCTCACCGCTGATCC	GTGCGCCATCCATGCTTAC	123	auxin-induced protein AUX28-like
Csa7G430250	GCTGCTGTTATTGGTATGCCG	ACAAGGGTGATAATAGAGGAGCA	270	4-coumarate--CoA ligase 2-like
Csa5G184280	CTGCAGTTCAGTGGTTGTGC	CCTCGCACTGTGTGGGTAAT	221	probable 18S rRNA

## Sheet: S2
Table S2 Quantitative determination of GA, ergosterol, ZT, IBA and IAA in fermentation broth of strain ND35
Hormone	Standard solution concentration(mg/mL)	Relative Retention Time(min)	Peak area of standard solution (mAU×s)	Peak area of test sample (mAU×s)	Test sample concentration (mg/mL)	Production of C. globosum strain ND35 (mg/L)
GA	0.05	2.128	156.057	242.631	0.0777378	0.777378
Ergosterol	1.5	1.559	11341.6	11152.3	1.47496	14.7496
Zeatin	1.5	3.672	11734.5	21.5633	0.0027564	0.027564
IBA	0.05	2.349	44.4529	1115	1.25414	12.5414
IAA	0.05	2.352	24.981	684.604	1.37025	13.7025

## Sheet: S3
Table S3 Summary of RNA-seq data
Sample	Reads No.	Q30 (%)	Clean reads No.	Clean reads rate (%)	Total mapped rate (%)	Uniquely mapped rate (%)	Number of expressed genes (RPKM ≥1)
CK24_1	45054554	94.07	41750726	92.66	96.8	97.18	15121
CK24_2	44408520	94.5	41120604	92.59	96.91	97.18	15140
CK24_3	46821424	94.52	43410612	92.71	97.04	97.21	15408
CK30_1	40343768	94.04	37358658	92.6	96.65	97.31	15228
CK30_2	42792048	94.39	39648664	92.65	96.9	97.32	15816
CK30_3	40582426	94.23	37634438	92.73	97.01	97.37	15302
CK36_1	42966644	94.25	39810676	92.65	96.56	97.22	16041
CK36_2	42604860	94.04	39137686	91.86	96.72	97.11	15857
CK36_3	42230820	94.27	39311210	93.08	96.82	97.1	15764
CK48_1	40890854	94.35	38014898	92.96	96.95	97.25	15599
CK48_2	40749202	94.4	37862842	92.91	96.88	97.19	16029
CK48_3	43479102	93.67	40352022	92.8	96.65	97.26	15608
CK60_1	40338394	94.15	37403372	92.72	96.38	97.18	16644
CK60_2	44180724	93.85	40845668	92.45	96.42	97.2	16490
CK60_3	42690984	94.1	39337722	92.14	96.56	97.13	16545
ND24_1	75416120	94.24	69678190	92.39	100	96.97	15004
ND24_2	73660802	94.29	68642382	93.18	96.96	97.03	15250
ND24_3	74630550	93.88	69499418	93.12	96.78	97.18	15219
ND30_1	79560226	94.11	73856126	92.83	96.69	97.25	15406
ND30_2	77815426	93.96	72554232	93.23	96.49	97.15	15188
ND30_3	77649206	94.54	72185560	92.96	96.87	97.25	15154
ND36_1	74563898	94.29	69239148	92.85	98.21	97.12	16107
ND36_2	72910910	93.69	67646904	92.78	96.64	97.06	15873
ND36_3	72948962	94.4	67547466	92.59	96.74	96.85	15753
ND48_1	67650456	94.35	63113850	93.29	95.54	96.71	16348
ND48_2	71357186	94.53	66542568	93.25	96.56	96.83	16562
ND48_3	74308830	94.48	69129870	93.03	96.43	96.91	16614
ND60_1	70240722	94.24	65406116	93.11	96.44	97.3	16397
ND60_2	70891472	94.32	65990514	93.08	96.7	97.27	16081
ND60_3	74720358	94.03	69417728	92.9	96.39	97.34	16237

## Sheet: S4
Table S4 Statistical analysis of differentially expressed genes (DEGs)
Control	Treat	Up-regulated	Down-regulated	Total
CK24	CK30	787	485	1272
CK24	CK36	1704	777	2481
CK24	CK48	2331	1087	3418
CK24	CK60	3485	1449	4934
CK24	ND24	45	31	76
CK30	ND30	242	46	288
CK30	CK36	298	75	373
CK36	CK48	1111	829	1940
CK36	ND36	332	120	452
CK48	ND48	1445	592	2037
CK48	CK60	1781	686	2467
CK60	ND60	444	262	706
ND24	ND30	1226	866	2092
ND24	ND36	2426	1186	3612
ND24	ND48	3380	1691	5071
ND24	ND60	4155	2183	6338
ND30	ND36	1368	361	1729
ND48	ND60	1376	671	2047

## Sheet: S5
Table S5 Enrichment analysis of Gene Ontology (GO) terms among differentially expressed genes.
Category	GO.ID	Term	Up													Down													DEG													Pvalue
			CK24	CK24	CK24	CK24	CK24	ND24	ND24	ND24	ND24	CK30	CK36	CK48	ND60	CK24	CK24	CK24	CK24	CK24	ND24	ND24	ND24	ND24	CK30	CK36	CK48	ND60	CK24	CK24	CK24	CK24	CK24	ND24	ND24	ND24	ND24	CK30	CK36	CK48	ND60	CK24	CK24	CK24	CK24	CK24	ND24	ND24	ND24
			CK30	CK36	CK48	CK60	ND24	ND30	ND36	ND48	ND60	ND30	ND36	ND48	ND60	CK30	CK36	CK48	CK60	ND24	ND30	ND36	ND48	ND60	ND30	ND36	ND48	ND60	CK30	CK36	CK48	CK60	ND24	ND30	ND36	ND48	ND60	ND30	ND36	ND48	ND60	CK30	CK36	CK48	CK60	ND24	ND30	ND36	ND48
MF	GO:0020037	heme binding	27	68	64	99	2	48	92	96	110	14	23	44	8	10	14	18	35	2	20	25	44	54	0	2	26	12	37	82	82	134	4	68	117	140	164	14	25	70	20	0.00011	1e-11	0.00013	2e-12	0.03179	1.3e-09	1.8e-16	8.8e-14
MF	GO:0046906	tetrapyrrole binding	27	76	83	118	2	48	105	115	133	17	32	52	25	13	17	18	35	2	22	27	44	55	0	2	26	12	40	93	101	153	4	70	132	159	188	17	34	78	37	6.2e-05	2e-14	4e-08	2.3e-16	0.04074	6.8e-09	3.6e-20	9.1e-18
MF	GO:0005506	iron ion binding	16	48	58	84	2	28	64	81	102	5	14	36	7	10	15	27	40	2	20	28	50	59	1	3	28	13	26	63	85	124	4	48	92	131	161	6	17	64	20	0.04252	5.8e-06	2e-06	4.9e-11	0.02619	0.00076	1.5e-08	8.9e-13
MF	GO:0016705	oxidoreductase activity, acting on paired donors, with incorporation or reduction of molecular oxygen	23	60	69	109	2	33	83	104	130	5	16	47	10	14	18	29	49	2	23	30	55	70	2	3	36	14	37	78	98	158	4	56	113	159	200	7	19	83	24	0.00344	1.6e-06	3.7e-05	1.3e-13	0.05579	0.00251	4.1e-09	5.2e-13
BP	GO:0055114	oxidation-reduction process	95	232	330	455	4	158	331	438	554	28	56	173	70	62	72	113	150	3	84	115	164	207	5	9	106	37	157	304	443	605	7	242	446	602	761	33	65	279	107	1.6e-07	3.4e-13	3.5e-19	2.1e-26	0.35707	8.8e-09	1.6e-21	1.9e-23
MF	GO:0016491	oxidoreductase activity	108	249	326	470	4	175	349	446	557	33	63	184	60	57	72	117	144	3	82	115	166	207	4	9	97	36	165	321	443	614	7	257	464	612	764	37	72	281	96	9.9e-11	2.5e-19	2.6e-22	< 1e-30	0.45562	3.5e-13	5.4e-28	5.7e-29
BP	GO:0009699	phenylpropanoid biosynthetic process	5	14	13	18	2	24	33	21	20	12	19	3	7	0	0	0	1	0	1	2	2	6	0	0	0	1	5	14	13	19	2	25	35	23	26	12	19	3	8	0.19829	0.00206	0.09768	0.02556	0.01232	1.4e-12	7.6e-16	0.00115
CC	GO:0009523	photosystem II	0	14	34	36	/	2	19	34	44	3	9	8	26	2	2	0	0	/	2	1	1	1	0	0	0	1	2	16	34	36	/	4	20	35	45	3	9	8	27	0.71912	1.2e-05	1.6e-16	3.9e-15	/	0.61665	9.2e-06	1.1e-13
CC	GO:0009521	photosystem	1	24	45	46	/	3	29	44	55	3	9	8	32	2	2	0	0	/	2	2	1	2	0	0	1	1	3	26	45	46	/	5	31	45	57	3	9	9	33	0.64123	1e-10	1.1e-21	3.4e-18	/	0.65743	2.2e-10	1.2e-16
CC	GO:0009535	chloroplast thylakoid membrane	1	23	91	93	/	5	36	81	123	3	7	8	46	6	7	0	2	/	6	5	1	3	0	0	2	0	7	30	91	95	/	11	41	82	126	3	7	10	46	0.72426	0.00062	< 1e-30	9.2e-26	/	0.83444	0.00035	4.5e-16
CC	GO:0055035	plastid thylakoid membrane	1	24	92	94	/	5	37	82	125	3	7	8	47	6	7	0	2	/	6	5	1	3	0	0	2	0	7	31	92	96	/	11	42	83	128	3	7	10	47	0.74198	0.00039	< 1e-30	1.2e-25	/	0.85138	0.00026	4.9e-16
CC	GO:0034357	photosynthetic membrane	1	31	112	114	/	6	46	101	155	4	9	10	63	6	8	0	2	/	7	7	2	5	0	0	3	1	7	39	112	116	/	13	53	103	160	4	9	13	64	0.8974	4.2e-05	< 1e-30	7.2e-30	/	0.89919	2e-05	4.8e-20
BP	GO:0019684	photosynthesis, light reaction	0	18	94	94	/	2	31	86	130	3	9	10	50	7	6	0	0	/	4	4	0	1	0	0	4	0	7	24	94	94	/	6	35	86	131	3	9	14	50	0.82669	0.09315	< 1e-30	6e-23	/	0.99825	0.03922	4e-17
CC	GO:0042651	thylakoid membrane	1	26	102	103	/	6	39	91	142	3	7	8	54	6	7	0	2	/	6	5	1	3	0	0	3	0	7	33	102	105	/	12	44	92	145	3	7	11	54	0.83149	0.00058	< 1e-30	3.7e-27	/	0.8755	0.00075	1.5e-17
BP	GO:0015995	chlorophyll biosynthetic process	0	5	38	40	/	3	11	32	46	/	/	0	12	1	1	0	0	/	3	1	2	0	/	/	3	0	1	6	38	40	/	6	12	34	46	/	/	3	12	0.97697	0.73463	3.8e-15	4.2e-12	/	0.55177	0.3277	1.1e-07
BP	GO:0006739	NADP metabolic process	0	10	66	61	/	2	19	61	86	/	/	4	23	6	8	6	9	/	7	8	9	13	/	/	5	1	6	18	72	70	/	9	27	70	99	/	/	9	24	0.87622	0.44661	2.8e-19	1.2e-10	/	0.95317	0.33105	2.8e-10
BP	GO:0006098	pentose-phosphate shunt	0	9	65	60	/	2	18	60	85	/	/	4	22	6	8	6	9	/	7	8	9	13	/	/	5	1	6	17	71	69	/	9	26	69	98	/	/	9	23	0.85484	0.48881	1.1e-19	5e-11	/	0.9394	0.34101	1.2e-10
BP	GO:0051156	glucose 6-phosphate metabolic process	0	9	65	61	/	2	18	60	85	/	/	4	22	6	8	6	9	/	7	8	9	13	/	/	5	1	6	17	71	70	/	9	26	69	98	/	/	9	23	0.85934	0.50111	1.8e-19	2.4e-11	/	0.94241	0.35532	1.8e-10
CC	GO:0009534	chloroplast thylakoid	1	28	120	126	/	7	45	111	170	3	9	9	62	10	10	0	3	/	9	7	3	3	0	0	3	0	11	38	120	129	/	16	52	114	173	3	9	12	62	0.59945	0.00084	< 1e-30	< 1e-30	/	0.82354	0.00069	6.5e-22
BP	GO:0046148	pigment biosynthetic process	0	9	58	61	1	5	23	54	85	/	2	7	19	5	6	3	8	0	6	8	5	6	/	0	5	0	5	15	61	69	1	11	31	59	91	/	2	12	19	0.92441	0.67252	1.3e-13	2.2e-11	0.36534	0.80539	0.05767	1.4e-06
CC	GO:0031976	plastid thylakoid	1	28	120	126	/	7	45	111	171	3	9	9	62	10	10	0	3	/	9	7	3	3	0	0	3	0	11	38	120	129	/	16	52	114	174	3	9	12	62	0.61155	0.001	< 1e-30	< 1e-30	/	0.83385	0.00085	1.7e-21
CC	GO:0044436	thylakoid part	1	31	120	123	/	7	46	107	168	4	9	10	68	6	9	0	2	/	8	8	2	5	0	0	3	1	7	40	120	125	/	15	54	109	173	4	9	13	69	0.93461	0.00011	< 1e-30	< 1e-30	/	0.85693	9.3e-05	3.1e-20
BP	GO:0010207	photosystem II assembly	0	5	45	39	/	0	12	36	59	/	/	0	16	4	2	0	0	/	1	1	0	0	/	/	4	0	4	7	45	39	/	1	13	36	59	/	/	4	16	0.63184	0.75409	9e-18	2.3e-08	/	0.99938	0.44158	1.7e-06
BP	GO:0015979	photosynthesis	1	33	131	131	/	5	50	119	177	3	9	10	68	7	6	0	0	/	4	4	2	3	0	0	7	1	8	39	131	131	/	9	54	121	180	3	9	17	69	0.96436	0.00827	< 1e-30	9.4e-29	/	0.99967	0.004	8.6e-22
CC	GO:0009579	thylakoid	1	35	158	164	/	11	58	147	228	4	10	11	83	10	11	0	4	/	11	9	5	6	0	0	4	1	11	46	158	168	/	22	67	152	234	4	10	15	84	0.91748	0.00318	< 1e-30	< 1e-30	/	0.84476	0.00066	1.2e-27
BP	GO:0009240	isopentenyl diphosphate biosynthetic process	/	4	61	54	/	2	11	46	73	/	/	1	21	/	3	0	2	/	1	2	2	2	/	/	1	0	/	7	61	56	/	3	13	48	75	/	/	2	21	/	0.95679	8.1e-23	3.4e-12	/	0.99758	0.88181	1.7e-07
BP	GO:0046490	isopentenyl diphosphate metabolic process	/	4	61	54	/	2	11	46	73	/	/	1	21	/	3	0	2	/	1	2	2	2	/	/	1	0	/	7	61	56	/	3	13	48	75	/	/	2	21	/	0.95679	8.1e-23	3.4e-12	/	0.99758	0.88181	1.7e-07
BP	GO:0019288	isopentenyl diphosphate biosynthetic process, methylerythritol 4-phosphate pathway	/	4	61	54	/	2	11	46	73	/	/	1	21	/	3	0	1	/	1	1	0	1	/	/	1	0	/	7	61	55	/	3	12	46	74	/	/	2	21	/	0.95033	1.7e-23	4.7e-12	/	0.99713	0.91817	6.7e-07
BP	GO:0006081	cellular aldehyde metabolic process	1	16	122	106	/	6	35	102	148	/	/	6	42	9	12	9	18	/	12	13	19	26	/	/	11	1	10	28	131	124	/	18	48	121	174	/	/	17	43	0.97871	0.86502	3.1e-30	7.8e-14	/	0.98506	0.52928	4.6e-12
BP	GO:0006091	generation of precursor metabolites and energy	3	30	122	124	/	10	48	114	167	3	10	20	61	20	20	24	25	/	17	20	28	36	2	0	21	2	23	50	146	149	/	27	68	142	203	5	10	41	63	0.79317	0.64163	1.7e-16	1.1e-06	/	0.99802	0.82923	8.2e-05
BP	GO:0019750	chloroplast localization	0	2	34	30	/	0	5	24	50	/	/	2	11	1	0	0	0	/	1	0	0	0	/	/	2	0	1	2	34	30	/	1	5	24	50	/	/	4	11	0.97394	0.99441	2.6e-12	5.4e-06	/	0.99765	0.97939	0.00357
BP	GO:0009902	chloroplast relocation	0	2	34	30	/	0	5	24	50	/	/	2	11	1	0	0	0	/	1	0	0	0	/	/	2	0	1	2	34	30	/	1	5	24	50	/	/	4	11	0.97394	0.99441	2.6e-12	5.4e-06	/	0.99765	0.97939	0.00357
BP	GO:0051667	establishment of plastid localization	0	2	34	30	/	0	5	24	50	/	/	2	11	1	0	0	0	/	1	0	0	0	/	/	2	0	1	2	34	30	/	1	5	24	50	/	/	4	11	0.97394	0.99441	2.6e-12	5.4e-06	/	0.99765	0.97939	0.00357
BP	GO:0051644	plastid localization	0	2	34	30	/	0	5	24	50	/	/	2	11	1	0	0	0	/	1	0	0	0	/	/	2	0	1	2	34	30	/	1	5	24	50	/	/	4	11	0.97394	0.99441	2.6e-12	5.4e-06	/	0.99765	0.97939	0.00357
BP	GO:0051656	establishment of organelle localization	0	2	34	30	/	0	5	24	50	/	/	2	11	1	0	0	0	/	1	0	0	0	/	/	2	0	1	2	34	30	/	1	5	24	50	/	/	4	11	0.97836	0.99599	1.8e-11	1.9e-05	/	0.99827	0.9858	0.00745
BP	GO:0006720	isoprenoid metabolic process	1	17	91	94	1	7	28	79	131	3	2	8	31	6	10	8	10	0	12	14	13	16	0	1	15	1	7	27	99	104	1	19	42	92	147	3	3	23	32	0.99649	0.80252	1.3e-15	7.2e-09	0.58017	0.93923	0.68749	5e-05
BP	GO:0008299	isoprenoid biosynthetic process	1	16	86	83	/	7	24	70	119	2	1	5	30	5	8	7	9	/	9	11	11	13	0	1	11	1	6	24	93	92	/	16	35	81	132	2	2	16	31	0.99393	0.72754	9e-18	8e-09	/	0.93448	0.73781	4.6e-05
BP	GO:0009668	plastid membrane organization	0	2	52	44	/	0	9	36	84	0	/	2	16	3	3	0	0	/	2	1	0	0	1	/	3	0	3	5	52	44	/	2	10	36	84	1	/	5	16	0.95871	0.99657	5.6e-14	4.6e-05	/	0.99979	0.99092	0.01641
BP	GO:0010027	thylakoid membrane organization	0	2	52	44	/	0	9	36	84	0	/	2	16	3	3	0	0	/	2	1	0	0	1	/	3	0	3	5	52	44	/	2	10	36	84	1	/	5	16	0.95871	0.99657	5.6e-14	4.6e-05	/	0.99979	0.99092	0.01641
BP	GO:0009658	chloroplast organization	0	2	51	40	/	1	8	35	87	/	/	3	20	2	3	1	0	/	2	4	2	1	/	/	4	0	2	5	52	40	/	3	12	37	88	/	/	7	20	0.9975	0.9997	1.4e-09	0.0537	/	0.99986	0.99682	0.18417
BP	GO:0019682	glyceraldehyde-3-phosphate metabolic process	0	12	103	94	/	3	27	91	130	/	/	5	39	6	9	6	10	/	7	8	9	14	/	/	5	1	6	21	109	104	/	10	35	100	144	/	/	10	40	0.9862	0.78347	< 1e-30	4e-17	/	0.99672	0.51003	1.6e-14
CC	GO:0009526	plastid envelope	3	16	100	99	/	9	29	95	169	2	3	4	47	8	9	7	7	/	9	15	12	7	0	0	7	0	11	25	107	106	/	18	44	107	176	2	3	11	47	0.94138	0.93009	4.3e-14	3.7e-07	/	0.98439	0.76313	1.1e-06
CC	GO:0009941	chloroplast envelope	2	14	94	94	/	8	27	90	162	2	3	3	44	7	9	7	7	/	8	14	11	7	0	0	5	0	9	23	101	101	/	16	41	101	169	2	3	8	44	0.97667	0.94673	4.4e-13	6.8e-07	/	0.99131	0.8034	3.3e-06
CC	GO:0009532	plastid stroma	5	19	135	134	/	13	36	130	209	3	4	10	58	9	9	4	8	/	13	14	8	10	1	0	5	1	14	28	139	142	/	26	50	138	219	4	4	15	59	0.90925	0.96149	2.8e-23	1.6e-14	/	0.89284	0.81985	6.7e-12
CC	GO:0009570	chloroplast stroma	5	17	130	130	/	13	34	127	200	3	4	10	58	9	9	4	8	/	13	14	8	10	0	0	5	1	14	26	134	138	/	26	48	135	210	3	4	15	59	0.88341	0.97456	2.6e-22	2.4e-14	/	0.85275	0.8306	4.4e-12
BP	GO:0009657	plastid organization	0	9	88	75	/	1	20	68	142	0	1	4	32	4	6	1	0	/	3	5	2	1	1	0	7	0	4	15	89	75	/	4	25	70	143	1	1	11	32	0.99885	0.98901	3.3e-18	4.4e-05	/	1	0.98093	0.00131
CC	GO:0044434	chloroplast part	6	42	237	240	/	20	75	226	370	4	9	18	107	21	23	11	17	/	25	28	22	18	0	0	10	1	27	65	248	257	/	45	103	248	388	4	9	28	108	0.93533	0.68602	< 1e-30	5.4e-25	/	0.98079	0.47421	1.6e-19
CC	GO:0044435	plastid part	7	44	243	243	/	21	76	228	380	4	9	19	107	21	23	11	17	/	25	29	23	18	1	0	12	1	28	67	254	260	/	46	105	251	398	5	9	31	108	0.93569	0.69494	< 1e-30	9.9e-24	/	0.98529	0.53426	2.1e-18
CC	GO:0009536	plastid	13	66	332	339	0	30	113	315	548	6	12	31	134	32	34	23	32	1	40	46	43	40	2	1	20	3	45	100	355	371	1	70	159	358	588	8	13	51	137	0.99715	0.9963	1.3e-30	1.4e-14	0.9896	0.99999	0.99373	1e-09
CC	GO:0009507	chloroplast	12	63	328	332	0	29	110	312	534	5	12	27	133	32	34	17	29	1	40	42	40	36	1	0	19	3	44	97	345	361	1	69	152	352	570	6	12	46	136	0.99317	0.99047	< 1e-30	3.9e-16	0.9865	0.99995	0.98903	8.2e-12
[truncated: 6 more columns]

## Sheet: S6
Table S6 Enrichment of KEGG pathways among differentially expressed genes.
PathwayID	Pathway	Up													Down													DEG													Pvalue
		CK24	CK24	CK24	CK24	CK24	ND24	ND24	ND24	ND24	CK30	CK36	CK48	ND60	CK24	CK24	CK24	CK24	CK24	ND24	ND24	ND24	ND24	CK30	CK36	CK48	ND60	CK24	CK24	CK24	CK24	CK24	ND24	ND24	ND24	ND24	CK30	CK36	CK48	ND60	CK24	CK24	CK24	CK24	CK24	ND24	ND24	ND24	ND24
		CK30	CK36	CK48	CK60	ND24	ND30	ND36	ND48	ND60	ND30	ND36	ND48	ND60	CK30	CK36	CK48	CK60	ND24	ND30	ND36	ND48	ND60	ND30	ND36	ND48	ND60	CK30	CK36	CK48	CK60	ND24	ND30	ND36	ND48	ND60	ND30	ND36	ND48	ND60	CK30	CK36	CK48	CK60	ND24	ND30	ND36	ND48	ND60
ko00940	Phenylpropanoid biosynthesis	26	55	43	67	5	50	70	67	65	19	23	30	9	2	3	8	5	0	4	4	11	13	0	1	5	5	28	58	51	72	5	54	74	78	78	19	24	35	14	2.38791e-08	9.34882e-20	1.15226e-08	9.29071e-15	1.3489e-05	1.39832e-19	3.00199e-23	3.34176e-17	2.35934e-11
ko00360	Phenylalanine metabolism	6	13	14	20	3	18	25	16	20	11	13	6	7	1	1	3	2	0	3	1	3	5	0	0	5	0	7	14	17	22	3	21	26	19	25	11	13	11	7	0.0481995	0.00260933	0.00544997	0.0013005	0.000255407	1.9013e-08	6.67276e-08	0.0267632	0.00489898
ko03450	Non-homologous end-joining	0	0	0	0	/	0	0	0	0	/	/	/	/	2	5	5	6	/	4	4	5	6	/	/	/	/	2	5	5	6	/	4	4	5	6	/	/	/	/	0.0787286	0.000702281	0.0039034	0.00158709	/	0.00441778	0.0258684	0.0157494	0.00742759
ko00460	Cyanoamino acid metabolism	5	14	15	20	/	9	13	19	22	3	1	9	4	1	1	3	1	/	2	1	4	5	0	1	1	2	6	15	18	21	/	11	14	23	27	3	2	10	6	0.0704708	0.000177032	0.000357199	0.000427082	/	0.00608108	0.0172337	9.23219e-05	4.861e-05
ko00130	Ubiquinone and other terpenoid-quinone biosynthesis	6	7	10	13	2	9	11	15	19	3	6	8	4	0	0	1	0	0	1	0	1	2	0	0	2	0	6	7	11	13	2	10	11	16	21	3	6	10	4	0.0336523	0.16398	0.0546058	0.0710095	0.00382919	0.0046988	0.0502481	0.0100845	0.00120578
ko00945	Stilbenoid, diarylheptanoid and gingerol biosynthesis	5	5	3	6	1	6	5	4	6	/	2	2	0	1	1	1	0	0	1	1	1	1	/	0	2	1	6	6	4	6	1	7	6	5	7	/	2	4	1	3.0146e-05	0.000944702	0.112938	0.02413	0.0271152	3.94172e-05	0.00614746	0.102028	0.0253653
ko00999	Biosynthesis of secondary metabolites - unclassified	/	2	2	2	/	1	2	2	2	/	/	/	/	/	0	0	0	/	0	0	0	0	/	/	/	/	/	2	2	2	/	1	2	2	2	/	/	/	/	/	0.0123291	0.025858	0.0438887	/	0.184069	0.0251705	0.0483947	0.0770381
ko00941	Flavonoid biosynthesis	5	5	3	10	1	6	5	7	11	/	3	2	/	2	5	1	1	0	2	2	0	0	/	0	1	/	7	10	4	11	1	8	7	7	11	/	3	3	/	4.68675e-05	5.15638e-06	0.326552	0.000242004	0.0404118	0.000133367	0.0158553	0.0796986	0.00309644
ko00196	Photosynthesis - antenna proteins	0	6	15	15	/	0	10	15	18	3	9	8	15	2	2	0	0	/	2	1	0	0	0	0	0	0	2	8	15	15	/	2	11	15	18	3	9	8	15	0.293453	0.000353854	5.83289e-10	2.66372e-08	/	0.531046	1.65989e-05	5.35944e-08	9.08608e-11
ko00250	Alanine, aspartate and glutamate metabolism	4	6	10	12	/	5	12	13	14	0	/	10	2	3	6	7	6	/	3	5	5	8	1	/	3	1	7	12	17	18	/	8	17	18	22	1	/	13	3	0.0281212	0.00730737	0.00141907	0.0100262	/	0.105133	0.00121718	0.016524	0.00985941
ko04075	Plant hormone signal transduction	9	26	30	61	/	15	37	54	63	1	5	16	7	9	10	21	23	/	18	21	24	31	2	5	13	6	18	36	51	84	/	33	58	78	94	3	10	29	13	0.199482	0.0405744	0.0224474	3.33959e-07	/	0.0261429	0.000577287	0.000119713	9.62683e-05
ko00220	Arginine biosynthesis	2	2	6	8	/	2	5	8	10	/	/	7	1	3	6	6	5	/	3	4	4	8	/	/	3	1	5	8	12	13	/	5	9	12	18	/	/	10	2	0.0675212	0.0467518	0.0104815	0.0325593	/	0.284735	0.120577	0.094348	0.00542251
ko00073	Cutin, suberine and wax biosynthesis	2	4	4	5	/	1	3	3	6	/	/	1	/	0	6	4	4	/	3	5	7	3	/	/	4	/	2	10	8	9	/	4	8	10	9	/	/	5	/	0.42548	0.000123655	0.0290513	0.0470825	/	0.197197	0.0269823	0.0240244	0.197929
ko00710	Carbon fixation in photosynthetic organisms	0	4	20	22	/	3	13	21	27	/	1	4	9	6	5	5	9	/	5	6	9	10	/	0	9	0	6	9	25	31	/	8	19	30	37	/	1	13	9	0.147765	0.21767	1.93849e-06	1.30236e-07	/	0.220171	0.00168955	1.57668e-06	3.80627e-08
ko00592	alpha-Linolenic acid metabolism	3	9	9	7	/	5	8	8	10	/	1	4	0	5	5	3	4	/	4	4	4	4	/	0	11	2	8	14	12	11	/	9	12	12	14	/	1	15	2	0.00153758	2.92093e-05	0.013133	0.155024	/	0.00879697	0.0118354	0.111529	0.142438
ko00904	Diterpenoid biosynthesis	2	6	7	8	/	4	9	10	7	1	1	2	0	1	2	1	3	/	1	2	5	7	0	1	5	1	3	8	8	11	/	5	11	15	14	1	2	7	1	0.233453	0.00917278	0.0684071	0.0206155	/	0.127719	0.00241274	0.000253435	0.0101794
ko00500	Starch and sucrose metabolism	13	19	20	25	/	13	18	29	40	1	0	17	7	6	5	13	12	/	6	12	17	17	0	2	5	2	19	24	33	37	/	19	30	46	57	1	2	22	9	0.000198588	0.00674788	0.00309949	0.0196889	/	0.0382184	0.0156514	0.000199989	3.1282e-05
ko00350	Tyrosine metabolism	2	4	6	10	/	3	6	7	10	/	/	2	1	2	2	2	5	/	3	2	4	5	/	/	4	2	4	6	8	15	/	6	8	11	15	/	/	6	3	0.17815	0.223119	0.235531	0.00525015	/	0.142186	0.224171	0.172569	0.0634178
ko00905	Brassinosteroid biosynthesis	2	3	2	3	/	3	4	3	2	1	1	1	0	1	0	2	2	/	2	3	2	4	0	0	0	3	3	3	4	5	/	5	7	5	6	1	1	1	3	0.0388597	0.168477	0.143319	0.116221	/	0.00554565	0.00176747	0.136983	0.122585
ko00260	Glycine, serine and threonine metabolism	4	10	13	19	/	7	13	15	23	0	/	5	6	1	2	2	2	/	3	1	1	3	2	/	1	0	5	12	15	21	/	10	14	16	26	2	/	6	6	0.324755	0.0422709	0.0713614	0.0148481	/	0.0788967	0.115242	0.301275	0.0139854
ko00910	Nitrogen metabolism	1	1	6	7	/	2	8	9	11	1	1	7	2	2	3	4	4	/	4	4	5	5	0	0	0	1	3	4	10	11	/	6	12	14	16	1	1	7	3	0.299508	0.482391	0.0244155	0.0550013	/	0.0827859	0.00246428	0.00486063	0.00615336
ko00195	Photosynthesis	1	22	34	32	/	3	22	34	36	/	/	/	23	1	2	0	0	/	0	1	0	0	/	/	/	0	2	24	34	32	/	3	23	34	36	/	/	/	23	0.737842	9.22995e-13	8.93152e-20	7.34722e-14	/	0.799672	1.29694e-08	2.27434e-15	2.7081e-14
ko04016	MAPK signaling pathway - plant	5	6	14	13	2	7	13	13	18	2	5	6	3	6	8	10	13	0	10	13	18	22	0	3	12	5	11	14	24	26	2	17	26	31	40	2	8	18	8	0.103515	0.465639	0.146906	0.459717	0.0299959	0.0691794	0.0561669	0.180479	0.103159
ko00630	Glyoxylate and dicarboxylate metabolism	4	7	19	20	/	5	11	17	27	0	/	8	7	0	1	1	1	/	3	2	2	2	1	/	6	0	4	8	20	21	/	8	13	19	29	1	/	14	7	0.500328	0.365674	0.000941304	0.0100373	/	0.233668	0.159965	0.061566	0.000751337
ko00053	Ascorbate and aldarate metabolism	2	7	10	10	/	6	11	11	14	1	1	5	1	2	1	3	2	/	1	1	3	3	0	2	3	1	4	8	13	12	/	7	12	14	17	1	3	8	2	0.281993	0.120067	0.0215875	0.219002	/	0.139335	0.0437809	0.100056	0.0929279
ko00040	Pentose and glucuronate interconversions	13	19	19	22	4	10	20	22	21	1	1	12	1	2	3	13	8	0	2	5	11	12	0	4	2	3	15	22	32	30	4	12	25	33	33	1	5	14	4	0.00200322	0.00375678	0.000331655	0.0604885	8.98055e-05	0.362645	0.0329546	0.0266888	0.310475
ko00906	Carotenoid biosynthesis	1	3	6	13	/	2	5	8	14	0	/	3	3	1	3	2	2	/	2	3	2	1	1	/	1	1	2	6	8	15	/	4	8	10	15	1	/	4	4	0.561609	0.122453	0.112602	0.000601287	/	0.352019	0.106018	0.124168	0.0114543
ko03410	Base excision repair	0	0	1	2	/	2	2	3	3	/	1	2	/	5	7	6	7	/	7	7	6	6	/	1	1	/	5	7	7	9	/	9	9	9	9	/	2	3	/	0.0396915	0.0577103	0.247205	0.212497	/	0.00255919	0.0558965	0.258637	0.548633
ko00591	Linoleic acid metabolism	1	2	2	2	/	1	2	2	2	/	1	1	/	0	1	0	0	/	1	0	1	1	/	0	3	/	1	3	2	2	/	2	2	3	3	/	1	4	/	0.350924	0.0339279	0.313869	0.449446	/	0.141514	0.307819	0.184074	0.302738
ko04712	Circadian rhythm - plant	0	2	3	5	/	2	4	4	5	1	/	0	/	7	9	1	6	/	5	9	3	7	0	/	3	/	7	11	4	11	/	7	13	7	12	1	/	3	/	0.00160177	0.000221394	0.734188	0.0349009	/	0.0216554	0.00032003	0.501116	0.100167
ko00860	Porphyrin and chlorophyll metabolism	0	3	19	19	/	1	9	15	22	/	/	0	4	4	3	1	5	/	3	2	6	5	/	/	1	0	4	6	20	24	/	4	11	21	27	/	/	1	4	0.254986	0.342249	2.65436e-06	5.38054e-07	/	0.608521	0.0680548	9.05675e-05	1.61785e-06
ko00330	Arginine and proline metabolism	3	4	7	11	/	3	6	11	13	/	0	4	2	3	2	7	8	/	4	3	10	12	/	1	4	1	6	6	14	19	/	7	9	21	25	/	1	8	3	0.101924	0.564259	0.0427541	0.0108543	/	0.264141	0.493473	0.0036174	0.00269639
ko00270	Cysteine and methionine metabolism	6	9	14	18	/	7	14	20	23	1	1	3	1	1	2	7	7	/	3	6	8	11	1	0	6	3	7	11	21	25	/	10	20	28	34	2	1	9	4	0.23645	0.328364	0.0227834	0.0352664	/	0.292179	0.0369361	0.010775	0.0077192
ko00051	Fructose and mannose metabolism	2	3	6	10	/	2	5	9	9	/	/	2	2	3	2	7	6	/	5	6	10	10	/	/	3	0	5	5	13	16	/	7	11	19	19	/	/	5	2	0.177541	0.665861	0.0487526	0.0448019	/	0.204854	0.158901	0.00736912	0.0745556
ko00410	beta-Alanine metabolism	2	4	10	12	/	3	7	10	11	/	/	4	2	2	1	1	3	/	1	1	2	3	/	/	3	0	4	5	11	15	/	4	8	12	14	/	/	7	2	0.215616	0.462319	0.0464434	0.0119968	/	0.549739	0.296001	0.150917	0.196113
ko02010	ABC transporters	1	2	3	5	/	2	3	5	4	/	/	2	1	1	2	4	3	/	1	3	4	5	/	/	2	0	2	4	7	8	/	3	6	9	9	/	/	4	1	0.42548	0.273597	0.0778671	0.110513	/	0.413823	0.169237	0.0619333	0.197929
ko00010	Glycolysis / Gluconeogenesis	1	5	12	13	/	4	7	14	16	0	1	5	5	10	8	14	18	/	9	9	23	24	1	0	10	3	11	13	26	31	/	13	16	37	40	1	1	15	8	0.0515223	0.396479	0.0156045	0.0264033	/	0.222324	0.628399	0.00150095	0.0157389
ko00950	Isoquinoline alkaloid biosynthesis	1	3	4	7	/	2	4	4	6	/	/	1	1	0	0	1	2	/	1	0	2	3	/	/	2	0	1	3	5	9	/	3	4	6	9	/	/	3	1	0.671177	0.322895	0.150507	0.00584026	/	0.249573	0.317151	0.186496	0.0372759
ko00430	Taurine and hypotaurine metabolism	0	1	2	3	/	0	1	2	1	/	/	1	0	2	0	1	3	/	1	0	3	3	/	/	1	1	2	1	3	6	/	1	1	5	4	/	/	2	1	0.0973256	0.653718	0.164734	0.0039164	/	0.599832	0.789079	0.0290814	0.220798
ko00380	Tryptophan metabolism	2	6	10	8	/	3	6	8	8	/	0	6	1	2	1	2	2	/	2	1	2	2	/	1	4	0	4	7	12	10	/	5	7	10	10	/	1	10	1	0.17815	0.109478	0.0104815	0.233717	/	0.284735	0.370799	0.285713	0.601734
ko00480	Glutathione metabolism	1	5	8	9	/	4	12	11	15	7	2	10	/	2	4	14	6	/	2	5	10	16	0	0	2	/	3	9	22	15	/	6	17	21	31	7	2	12	/	0.835167	0.456523	0.00273307	0.626352	/	0.74531	0.0766238	0.132427	0.00751832
ko00960	Tropane, piperidine and pyridine alkaloid biosynthesis	1	3	3	6	/	2	4	2	5	/	/	1	1	0	0	1	3	/	1	0	3	4	/	/	3	0	1	3	4	9	/	3	4	5	9	/	/	4	1	0.709453	0.38652	0.40522	0.0134629	/	0.304258	0.394711	0.458261	0.0744592
ko00030	Pentose phosphate pathway	0	2	8	9	/	1	6	11	13	/	/	1	4	2	1	3	4	/	3	2	4	6	/	/	2	0	2	3	11	13	/	4	8	15	19	/	/	3	4	0.749394	0.881198	0.0845941	0.113928	/	0.627036	0.398098	0.0441611	0.0198265
ko00280	Valine, leucine and isoleucine degradation	1	5	11	8	/	1	7	11	11	0	/	3	1	1	0	1	1	/	2	1	1	3	2	/	5	1	2	5	12	9	/	3	8	12	14	2	/	8	2	0.760506	0.570281	0.0478778	0.62135	/	0.824255	0.423953	0.274713	0.360267
ko00052	Galactose metabolism	2	4	5	7	/	3	5	6	11	1	1	1	1	0	2	6	3	/	1	7	9	8	0	0	1	0	2	6	11	10	/	4	12	15	19	1	1	2	1	0.771189	0.404382	0.109297	0.506094	/	0.662353	0.0510098	0.0635082	0.03256
ko00100	Steroid biosynthesis	0	1	1	1	/	0	0	0	1	/	/	0	1	2	1	6	2	/	2	4	7	4	/	/	2	0	2	2	7	3	/	2	4	7	5	/	/	2	1	0.360718	0.694769	0.0402374	0.847523	/	0.616602	0.433082	0.159776	0.73407
ko00740	Riboflavin metabolism	3	3	2	3	/	2	2	3	3	/	/	2	/	0	0	0	0	/	0	0	0	0	/	/	0	/	3	3	2	3	/	2	2	3	3	/	/	2	/	0.0566054	0.228149	0.721144	0.637154	/	0.433371	0.713632	0.673459	0.830704
ko00561	Glycerolipid metabolism	1	2	8	12	1	2	6	7	13	1	1	4	4	3	2	3	2	1	2	3	4	2	0	0	4	0	4	4	11	14	2	4	9	11	15	1	1	8	4	0.500328	0.919308	0.390848	0.399349	0.00831937	0.85421	0.648586	0.81652	0.754084
ko00511	Other glycan degradation	/	1	6	2	/	/	0	2	2	/	/	0	/	/	1	0	1	/	/	1	1	1	/	/	2	/	/	2	6	3	/	/	1	3	3	/	/	2	/	/	0.50881	0.0231632	0.637154	/	/	0.925349	0.673459	0.830704
ko04141	Protein processing in endoplasmic reticulum	0	1	2	9	/	19	5	6	30	11	8	4	20	4	6	8	8	/	6	10	15	10	0	1	5	0	4	7	10	17	/	25	15	21	40	11	9	9	20	0.990001	0.999475	0.999971	0.999894	/	0.0132533	0.995588	0.999053	0.845555
[truncated: 5 more columns]

## Sheet: S7
Table S7 The expression of genes related to pectin
Gene id	CK24 vs. ND24			CK30 vs. ND30			CK36 vs. ND36			Description
	CK24	ND24	foldChange	CK30	ND30	foldChange	CK36	ND36	foldChange
Csa1G538170	14.7611	39.0194	2.6434	644.434	201.513	0.312697	1965.9	695.635	0.353851	pectinesterase/pectinesterase inhibitor 24
Csa3G126810	62.5446	312.802	5.00127	454.254	359.099	0.790525	709.264	1217.6	1.71671	pectinesterase 2
Csa3G664600	13.1543	46.0866	3.50354	38.1888	48.5112	1.2703	45.3739	73.6648	1.6235	hypothetical protein
Csa4G291360	224.139	478.212	2.13355	888.492	1091.94	1.22898	976.698	820.293	0.839864	hypothetical protein
Csa5G154210	24.0739	55.8386	2.31946	81.5412	88.0999	1.08043	117.44	80.4245	0.684811	probable copper-transporting ATPase HMA5
Csa5G167190	2.56862	59.6125	23.208	395.598	496.525	1.25512	576.549	1393.7	2.41731	pectinesterase 2
